# Supplementary material for: Safety and Feasibility of Anti-CD19 CAR T Cells Expressing Inducible IL-7 and CCL19 in Patients with Relapsed or Refractory Large B-cell Lymphoma
Source: Research Square preprint supplement (doi:10.21203/rs.3.rs-2124394/v1), 2022-10-14
Supplement: Supplementary file 1 [file 5492e8c9016c42e2b4f27546.docx]

# Supplementary Note

# Safety and Feasibility of Anti-CD19 CAR T Cells Expressing Inducible IL-7 and CCL19 in Patients with Relapsed or Refractory Large B-cell Lymphoma

**Supplementary Table 1: Characteristics of enrolled patients and CAR T cell products**

| **Patient** | **Age**  **/Sex** | **Diagnosis** | **Doses**  **(kg)** | | **Culture**  **(day)** | **Viability**  **(%)** | | **Response** | **CD3+CAR+ (%)** | **CD3+**  **(%)** | **CD3+CD4+**  **(%)** | **CD3+CD8+ (%)** | **Naïve (%)** | **Tcm**  **(%)** | **Tem (%)** | **TEMRA**  **(%)** |
| --- | --- | --- | --- | --- | --- | --- | --- | --- | --- | --- | --- | --- | --- | --- | --- | --- |
| 1 | 57/M | Non-GCB  DLBCL | | 2×106 | 15 | | 93.0 | CR | 14.1 | 98.4 | 13.1 | 80.3 | 14.5 | 17.5 | 40.9 | 27.1 |
| 2 | 73/M | MCL | | 3.5×105 | 15 | | 97.5 | CR | 22.9 | 96.6 | 57.2 | 23.2 | 7.1 | 57.0 | 33.9 | 1.7 |
| 3 | 52/F | GCB DLBCL | | 4×106 | 15 | | 95.0 | CR | 15.7 | 93.0 | 29.6 | 59.7 | 36.9 | 60.9 | 1.3 | 0.9 |
| 4 | 66/M | GCB DLBCL | | 1.43×106 | 14 | | 95.0 | CR | 11.0 | 95.0 | 13.0 | 69.0 | 17.2 | 13.3 | 31.0 | 38.5 |
| 5 | 37/M | GCB DLBCL | | 1.8×106 | 11 | | 91.4 | PD | 12.0 | 98.5 | 29.9 | 65.0 | 7.0 | 10.1 | 60.8 | 22.2 |
| 6 | 65/M | Non-GCB  DLBCL | | 4×106 | 12 | | 96.5 | PR | 48.1 | 98.0 | 47.5 | 44.5 | 5.2 | 3.7 | 45.7 | 45.5 |
| 7 | 48/F | t-FL | | 4.3×106 | 15 | | 96.0 | CR | 12.6 | 92.0 | 54.4 | 28.7 | 39.6 | 33.7 | 16.2 | 10.2 |
| 8 | 62/F | Non-GCB  DLBCL | | 2×106 | 12 | | 97.0 | CR | 32.4 | 98.0 | 43.4 | 40.1 | 58.9 | 13.0 | 11.4 | 16.7 |
| 9 | 72/F | Non-GCB  DLBCL | | 1.13×106 | 12 | | 98.0 | CR | 20.6 | 98.0 | 74.9 | 14.7 | 36.6 | 49.1 | 9.8 | 4.5 |
| 10 | 49/F | Non-GCB  DLBCL | | 0.5×106 | 13 | | 98.0 | PR | 37.6 | 98.0 | 73.8 | 6.1 | 21.8 | 15.1 | 46.9 | 16.3 |
| 11 | 67/M | Non-GCB  DLBCL | | 1×106 | 12 | | 96.0 | CR | 33.1 | 90.4 | 41.1 | 51.3 | 44.1 | 22.3 | 15.4 | 18.2 |
| 12 | 37/M | Non-GCB  DLBCL | | 1×106 | 12 | | 95.0 | SD | 37.0 | 97.2 | 10.1 | 82.2 | 18.5 | 4.6 | 15.6 | 61.4 |
| 13 | 62/F | Non-GCB  DLBCL | | 1×106 | 12 | | 94.0 | CR | 65.3 | 98.7 | 46.2 | 40.6 | 78.9 | 10.0 | 1.6 | 9.5 |
| 14 | 68/M | Non-GCB  DLBCL | | 2×106 | 12 | | 93.0 | CR | 52.4 | 98.7 | 62.4 | 23.7 | 58.4 | 31.6 | 4.2 | 5.8 |
| 15 | 50/F | Non-GCB  DLBCL | | 4×106 | 13 | | 95.0 | CR | 41.8 | 99.5 | 73.7 | 10.6 | 39.2 | 19.1 | 18.8 | 22.9 |
| 16 | 69/M | Non-GCB  DLBCL | | 1×106 | 14 | | 92.0 | PD | 22.3 | 98.3 | 10.9 | 78.8 | 15.7 | 17.4 | 21.3 | 45.6 |
| 17 | 65/M | MCL | | 2×106 | 13 | | 96.0 | PR | 38.1 | 99.5 | 34.8 | 48.0 | 14.6 | 27.5 | 23.7 | 34.2 |
| 18 | 60/M | Non-GCB  DLBCL | | 1×106 | 13 | | 94.0 | SD | 28.2 | 99.1 | 46.7 | 36.1 | 3.5 | 7.6 | 44.9 | 43.9 |
| 19 | 54/M | Non-GCB  DLBCL | | 5×105 | 14 | | 96.0 | PD | 15.7 | 93.5 | 75.1 | 9.9 | 40.8 | 28.7 | 14.0 | 16.6 |
| 20 | 72/M | Non-GCB  DLBCL | | 1×106 | 14 | | 94.0 | CR | 21.3 | 95.9 | 56.9 | 27.8 | 45.4 | 21.3 | 13.0 | 20.3 |
| 21 | 55/M | Non-GCB  DLBCL | | 1×106 | 14 | | 97.0 | PR | 34.6 | 97.1 | 15.1 | 81.6 | 6.9 | 10.7 | 30.1 | 52.3 |
| 22 | 44/M | Non-GCB  DLBCL | | 2×106 | 14 | | 98.0 | CR | 23.0 | 90.2 | 5.5 | 88.0 | 52.8 | 5.3 | 4.0 | 38.0 |
| 23 | 66/M | GCB DLBCL | | 1×106 | 14 | | 92.0 | SD | 30.8 | 97.9 | 28.8 | 58.2 | 2.1 | 5.0 | 24.5 | 68.4 |
| 24 | 69/F | GCB DLBCL | | 1×106 | 12 | | 90.0 | SD | 35.1 | 94.2 | 56.2 | 31.0 | 2.5 | 2.8 | 27.0 | 67.7 |
| 25 | 46/M | HGBL-  DHL | | 2×106 | 13 | | 91.0 | PD | 31.5 | 94.9 | 4.4 | 79.2 | 3.1 | 6.3 | 24.7 | 65.7 |
| 26 | 50/M | GCB DLBC | | 1×106 | 15 | | 91.5 | CR | 22.6 | 98.6 | 53.8 | 35.2 | 3.4 | 7.7 | 29.9 | 59.0 |
| 27 | 60/M | GCB DLBCL | | 0.5×106 | 15 | | 92.0 | CR | 25.7 | 95.4 | 25.4 | 64.4 | 2.4 | 5.8 | 20.6 | 71.2 |
| 28 | 53/M | MCL | | 1×106 | 13 | | 92.0 | CR | 29.1 | 97.5 | 56.2 | 34.8 | 1.8 | 59.4 | 34.7 | 4.1 |
| 29 | 69/F | Non-GCB  DLBCL | | 1×106 | 13 | | 93.0 | PR | 29.1 | 97.5 | 56.2 | 34.8 | 1.8 | 59.4 | 34.7 | 4.1 |
| 30 | 64/M | Non-GCB  DLBCL | | 2×106 | 15 | | 94.0 | CR | 39.9 | 98.7 | 47.7 | 26.7 | 1.3 | 2.4 | 16.2 | 80.2 |
| 31 | 46/F | Non-GCB  DLBCL | | 1×106 | 14 | | 98.0 | CR | 38.3 | 99.0 | 44.5 | 33.92 | 1.61 | 3.46 | 32.7 | 62.2 |
| 32 | 29/M | PMBL | | 1×106 | 13 | | 98.0 | PR | 28.6 | 98.9 | 58.7 | 27.16 | 1.2 | 2.66 | 27.4 | 68.8 |
| 33 | 42/M | Non-GCB  DLBCL | | 1×106 | 13 | | 97.0 | CR | 16.2 | 99.5 | 74.7 | 14.8 | 6.98 | 28.5 | 42.1 | 22.5 |
| 34 | 50/F | TFL | | 1×106 | 14 | | 96.0 | CR | 61.7 | 99.3 | 22.9 | 65.03 | 1.1 | 1.1 | 17.1 | 90.8 |
| 35 | 51/M | Non-GCB  DLBCL | | 1×106 | 12 | | 96.0 | CR | 38.1 | 99.3 | 76.8 | 13.24 | 2.3 | 2.5 | 23.0 | 72.2 |
| 36 | 46/F | DLBCL-Unclassified | | 0.5×106 | 12 | | 96.0 | PR | 26.7 | 98.9 | 63.0 | 23.23 | 4.4 | 18.0 | 61.2 | 16.4 |
| 37 | 55/F | GCB DLBCL | | 1×106 | 12 | | 98.0 | PR | 38.1 | 98.8 | 90.1 | 5.97 | 0.65 | 0.9 | 25.6 | 72.9 |
| 38 | 50/F | GCB DLBCL | | 1×106 | 12 | | 97.0 | PR | 32.8 | 98.0 | 71.7 | 14.9 | 2.65 | 20.3 | 63.9 | 13.1 |
| 39 | 64/F | Non-GCB  DLBCL | | 1×106 | 13 | | 98.0 | CR | 28.2 | 99.9 | 95.0 | 1.74 | 10.1 | 87.4 | 0.9 | 1.6 |

GCB, Germinal center B cell; DLBCL, Diffuse large B-cell lymphoma; HGBL-DHL, High grade B-Cell lymphoma; MCL, Mantle cell lymphoma; t-FL:Transformed foliicular lymphoma; PMBL, Primary mediastinal large B-cell lymphoma; CR, Complete remission; PR, Partial remission; SD, Stable disease; P, Progressive disease; Tcm, Central memory T cells; Tem: Effectively memory T cells; TEMRA, Terminally differentiated effector memory T cells.

**Supplementary Table 2.** Subgroup analysis of objective response

| **Patients Characteristics** | **Numbers** | **CR/PR at 3 months** | **PD/SD at**  **3 months** | ***P* Value** |
| --- | --- | --- | --- | --- |
| Patients | 39 | 31 | 8 |  |
| Gender |  |  |  |  |
| Male | 23 | 17 | 6 | 0.8306 |
| Female | 16 | 14 | 2 |  |
| Age, y |  |  |  |  |
| ≤60 | 23 | 18 | 5 | 0.2666 |
| > 60 | 16 | 13 | 3 |  |
| Dose, ×106/kg |  |  |  |  |
| 0.5-1.0 | 26 | 20 | 6 | 0.9973 |
| 2.0-4.0 | 13 | 11 | 2 |  |
| B Symptoms |  |  |  |  |
| Absent | 34 | 27 | 7 | 0.3673 |
| Present | 5 | 4 | 1 |  |
| ECOG |  |  |  |  |
| 0-1 | 23 | 20 | 3 | 0.1620 |
| 2-3 | 16 | 11 | 5 |  |
| Stage |  |  |  |  |
| Ⅰ/Ⅱ | 13 | 10 | 3 | 0.6583 |
| Ⅲ/Ⅳ | 26 | 21 | 5 |  |
| Extranodal sites, n |  |  |  |  |
| ≤1 | 25 | 23 | 2 | 1.003 |
| >1 | 14 | 8 | 6 |  |
| LDH |  |  |  |  |
| Normal | 6 | 6 | 0 | 0.54 |
| Elevated | 33 | 25 | 8 |  |
| IPI Score |  |  |  |  |
| 0-2 | 18 | 16 | 2 | 0.0995 |
| 3-5 | 21 | 15 | 6 |  |
| CRS, grade |  |  |  |  |
| 0-1 | 19 | 13 | 6 | 0.1274 |
| 2-4 | 20 | 18 | 2 |  |
| ICANS, grade |  |  |  |  |
| 0-2 | 35 | 27 | 8 | 0.5628 |
| 3-4 | 4 | 4 | 0 |  |
| Previous Response |  |  |  |  |
| Refractory | 20 | 14 | 6 | 0.0330 |
| Relapse | 19 | 17 | 2 |  |
| Tocilizumab |  |  |  |  |
| Not used | 23 | 16 | 7 | 0.7035 |
| Used | 16 | 15 | 1 |  |
| Glucocorticoid |  |  |  |  |
| Not Used | 27 | 20 | 7 | 0.269 |
| Used | 12 | 11 | 1 |  |

CR, complete remission; PR, partial remission; SD, stable disease; PD, Progressive disease;

CRS, cytokine release syndrome; ICANS, immune effector cell-associated neurotoxicity Syndrome; IPI, international prognostic index; LDH, lactate dehydrogenase, ECOG, Eastern Cooperative Oncology Group.CR, Complete remission; PR, Partial remission; SD, Stable disease; PD, Progressive disease.

**Supplementary Table 3. Summary of low-level CAR+ cell persistence and time points**

| **Patient**  **Number** | **Last time-point after infusion that blood CAR+ cells were detectable by quantitative PCR+** | **Percentages of CAR+ cell at last time-point** | **Status** |
| --- | --- | --- | --- |
| 2 | CAR+ cells was still detectable in the 24th month after infusion | 0.024% | Ongoing CR |
| 3 | CAR+ cells was last detected in the 27th month after infusion | 0.001% | Ongoing CR |
| 4 | CAR+ cells was persistently detected 28 months after infusion | 0.003% | Ongoing CR |
| 7 | CAR+ cells was persistently detected 21 months after infusion | 0.143% | Ongoing CR |
| 9 | CAR+ cells was still detectable in the 18th month after infusion | 0.003% | Ongoing CR |
| 10 | CAR+ cells was still detectable 21 months after infusion | 0.004% | Ongoing CR |
| 13 | CAR+ cells was still detectable in the 18th month after infusion | 0.06% | Ongoing CR |
| 15 | CAR+ cells was last detected in the 23th month after infusion | 0.177% | Ongoing CR |
| 17 | CAR+ cells was still detectable 18 months after infusion | 0.024% | Ongoing CR |
| 20 | CAR+ cells was persistently detected 31 months after infusion | 0.001% | Ongoing CR |
| 22 | CAR+ cells was persistently detected 23months after infusion | 0.003% | Ongoing CR |
| 27 | CAR+ cells was persistently detected 15 months after infusion | 0.014% | Ongoing CR |
| 29 | CAR+ cells was still detectable 25 months after infusion | 30.793% | Ongoing PR |
| 31 | CAR+ cells was still detectable 22 months after infusion | 0.002% | Ongoing CR |
| 33 | CAR+ cells was still detectable 6 months after infusion | 0.028% | Ongoing CR |
| 34 | CAR+ cells was still detectable 26 months after infusion | 0.037% | Ongoing CR |
| 39 | CAR+ cells was last detected in the 20th month after infusion | 0.003% | Ongoing CR |

CAR+ T cell persistence in patients of long-tern remission were monitored by detecting absolute number of CAR+ peripheral mononuclear cells (PBMCs) in the blood using quantitative RT-PCR. CAR+ cell levels are presented as a percentage of the total PBMC that contains the CAR gene. CAR gene levels were determined by quantitative PCR.
